# Supplementary material for: Non-Mammalian Models for Understanding Neurological Defects in RASopathies
Source: MDPI journal article supplement (doi:10.3390/biomedicines12040841), 2024-04-10
Supplement: s1 [file s1]

| RASopathy         | Model organism     | RASopathy gene    | Mutation                                                          | Features                                                                                                             | Reference                           |
|-------------------|--------------------|-------------------|-------------------------------------------------------------------|----------------------------------------------------------------------------------------------------------------------|-------------------------------------|
| NF1               | <i>Danio rerio</i> | NF1               | nf1a-/-<br>nf1b-/-                                                | Macrocephaly and increased OPC migration within the spinal cord                                                      | 81                                  |
| NS                | <i>Danio rerio</i> | <i>PTPN11</i>     | Shp2 p.D61G                                                       | Craniofacial defects                                                                                                 | 93                                  |
|                   |                    | <i>RRAS2</i>      | RRAS2 p.G24_26dup                                                 | Craniofacial defects and macrocephaly                                                                                | 95                                  |
|                   |                    |                   | RRAS2 p.Q72H                                                      |                                                                                                                      |                                     |
|                   |                    |                   | RRAS2 p.Q72L                                                      | Craniofacial defects and developmental impairment                                                                    |                                     |
|                   |                    |                   | RRAS2 p.F75C                                                      | No aberrant in vitro or in vivo phenotypes                                                                           |                                     |
|                   |                    | <i>A2ML1**</i>    | A2ML1 p.R592L                                                     | Craniofacial defects that are characteristic of NS, including a broad head                                           | 75                                  |
|                   |                    |                   | A2ML1 p.R802L                                                     |                                                                                                                      |                                     |
|                   |                    |                   | A2ML1 p.R802H                                                     |                                                                                                                      |                                     |
|                   |                    | <i>SPRED2</i>     | SPRED2 p.R63*                                                     | NS evocative phenotypes, such as developmental delay and intellectual disability                                     | 4                                   |
|                   |                    |                   | SPRED2 p.L100P                                                    |                                                                                                                      |                                     |
|                   |                    |                   | SPRED2 p.L381Hfs*95                                               |                                                                                                                      |                                     |
|                   |                    | <i>Drosophila</i> | <i>PTPN11</i>                                                     | Shp2 p.D61G                                                                                                          | Altered cellular signaling networks |
|                   | Shp2 p.Y279C       |                   |                                                                   |                                                                                                                      |                                     |
|                   | Shp2 p.N308D       |                   |                                                                   |                                                                                                                      |                                     |
|                   | Shp2 p.R498W       |                   |                                                                   |                                                                                                                      |                                     |
|                   | Shp2 p.Q510P       |                   |                                                                   |                                                                                                                      |                                     |
|                   | Shp2 p.Q510E       |                   |                                                                   |                                                                                                                      |                                     |
|                   | <i>BRAF</i>        |                   | BRAF1 p.Q257R                                                     | Altered cellular signaling networks                                                                                  | 119                                 |
|                   | BRAF p.W531C       |                   |                                                                   |                                                                                                                      |                                     |
|                   | <i>KRAS</i>        |                   | KRAS p.G12D                                                       | Altered cellular signaling networks                                                                                  | 119                                 |
|                   | <i>HRAS</i>        |                   | HRAS p.G12S                                                       | Altered cellular signaling networks                                                                                  | 119                                 |
|                   | <i>RAF1</i>        |                   | RAF1 p.S257L                                                      | Altered cellular signaling networks                                                                                  | 119                                 |
|                   |                    |                   | RAF1 p.D486G                                                      |                                                                                                                      |                                     |
|                   |                    | RAF1 p.L613V      |                                                                   |                                                                                                                      |                                     |
| <i>C. elegans</i> | <i>MAPK1</i>       | MAPK1 p.I74N      | Muv phenotype, consistent with aberrant RAS/MAPK pathway activity | 66                                                                                                                   |                                     |
|                   |                    | MAPK1 p.H80Y      |                                                                   |                                                                                                                      |                                     |
|                   |                    | MAPK1 p.A174V     |                                                                   |                                                                                                                      |                                     |
|                   |                    | MAPK1 p.D318G     |                                                                   |                                                                                                                      |                                     |
|                   |                    | MAPK1 p.P323R     |                                                                   |                                                                                                                      |                                     |
|                   | <i>SHOC2</i>       | SHOC2 p.S2G       | Aberrant RAS/MAPK signaling                                       | 125                                                                                                                  |                                     |
|                   | <i>RRAS</i>        | RRAS p.G39dup     | Enhanced RAS/MAPK signaling                                       | 126                                                                                                                  |                                     |
| CS                | <i>Danio rerio</i> | <i>HRAS</i>       | HRAS p.G12V                                                       | CS phenotypes such as craniofacial dysmorphia and oncogene-induced senescence in the brain                           | 99                                  |
| CFC               | <i>Danio rerio</i> | <i>BRAF</i>       | BRAF p.Q257R                                                      | Increased major:minor axis ratio                                                                                     | 101                                 |
|                   |                    |                   | BRAF p.V600E                                                      | Early induction: truncated posterior structure and compromised forebrain. At a later stage, craniofacial deformities | 102                                 |
|                   | <i>Drosophila</i>  | <i>MEK1</i>       | Dsor1 p.Y130C                                                     | Larval cuticle deficits and ectopic wing veins                                                                       | 103                                 |
| RASopathy-like    | <i>Danio rerio</i> | <i>RAC1</i>       | RAC1 p.P29S                                                       | Rasopathy-like phenotype                                                                                             | 97                                  |
|                   |                    | <i>RABL3</i>      | RABL3 p.S36*                                                      | Rasopathy-like phenotype                                                                                             | 98                                  |

**Table S2.** RASopathy-associated mutations studied in non-mammalian model organisms. Collation of investigated RASopathy-associated mutations in non-mammalian models emphasized in this review, along with observed related features. In genes related to Noonan Syndrome (NS), double asterisks (\*\*) signify an additional correlation between the mutations and Noonan-like syndrome.
